# Supplementary material for: Sensory Features Introduced by Brewery Spent Grain with Impact on Consumers’ Motivations and Emotions for Fibre-Enriched Products
Source: MDPI journal article supplement (doi:10.3390/foods11010036), 2021-12-24
Supplement: s1 [file s1]

### Supplementary Table S1

Nutritional facts of fibre-enriched and regular bread, pasta and chocolate milk expressed in 100 g of product.

|                                | Fibre-enriched bread | Regular bread | Fibre-enriched pasta | Regular pasta | Fibre-enriched chocolate milk | Regular chocolate milk |
|--------------------------------|----------------------|---------------|----------------------|---------------|-------------------------------|------------------------|
| Energy (kcal)                  | 284                  | 296           | 273                  | 276           | 76                            | 75                     |
| Proteins (g)                   | 9.6                  | 8.4           | 11.3                 | 10.9          | 3.1                           | 3.0                    |
| Lipids (g)                     | 7.5                  | 7.0           | 2.5                  | 2.3           | 1.7                           | 1.7                    |
| Dietary fibre (g)*             | 5.8                  | 1.8           | 3.4                  | 1.5           | 1.3                           | 1.1                    |
| Carbohydrates <sup>1</sup> (g) | 44.4                 | 49.8          | 51.4                 | 53.0          | 12.0                          | 11.9                   |

<sup>1</sup>- Carbohydrate content was obtained by difference.

\*Source of fibre claim in EU Regulation (EC) No 1924/2006, could be used when product has 3 g/100g of dietary fibre or 1.5 g of dietary fibre/100 kcal.
