# Supplementary material for: Sensory Features Introduced by Brewery Spent Grain with Impact on Consumers’ Motivations and Emotions for Fibre-Enriched Products
Source: MDPI journal article supplement (doi:10.3390/foods11010036), 2021-12-24
Supplement: s1 [file s1]

## Sensory evaluation of pasta

You will receive two samples of pasta. Please answer the following questions and then evaluate the two samples.

Age \_\_\_\_\_

Gender

- € Female
- € Male
- € Preferred not to say

How often do you eat pasta?

- € 2-3 times a week
- € At least once a week
- € 1-2 times per month
- € Never

### Sample #1

Please select one of the samples and write its three-digit code \_\_\_\_\_. First taste the sample and then answer the following questions.

#### SECTION I

**1) How much do you like this sample?**

|                               |                       |                       |                       |                       |                       |                       |                       |                       |                       |                            |
|-------------------------------|-----------------------|-----------------------|-----------------------|-----------------------|-----------------------|-----------------------|-----------------------|-----------------------|-----------------------|----------------------------|
|                               | 1                     | 2                     | 3                     | 4                     | 5                     | 6                     | 7                     | 8                     | 9                     |                            |
| <i>I extremely dislike it</i> | <input type="radio"/> | <i>I extremely like it</i> |

**2) From the following list, check all the attributes which best describe the sample. Choose all that apply.**

- |              |                 |                            |
|--------------|-----------------|----------------------------|
| € Natural    | € Coarse        | € Hard                     |
| € Tasty      | € Rubbery       | € Strange taste            |
| € Soft       | € Dark          | € Unpleasant aroma         |
| € Fibrous    | € Gritty        | € Insipid                  |
| € Uniform    | € Lack of taste | € Unpleasant<br>aftertaste |
| € Homogenous | € Flexible      | € Brittle                  |
| € Granulated | € Sticky        |                            |

**3) Would you buy this product?**

|                                      |                       |                       |                       |                       |                       |                                  |
|--------------------------------------|-----------------------|-----------------------|-----------------------|-----------------------|-----------------------|----------------------------------|
|                                      | 1                     | 2                     | 3                     | 4                     | 5                     |                                  |
| <i>I would definitely not buy it</i> | <input type="radio"/> | <i>I would definitely buy it</i> |

**4) If your previous answer (Question 3) was 4 or 5, then why would you buy it? Choose as many answers as you see fit.**

- € Because it is healthy
- € Because it is tasty
- € To avoid weight gain
- € Because it is high in calories
- € Because it is good for my family
- € Because I want to include fibre in my diet
- € Because my kids would like it

**5) If your previous answer to Question 3 was 1, 2 or 3, then why wouldn't you buy it? Choose as many answers as you see fit.**

- € Because it does not seem healthy
- € Because it is distasteful
- € Because it is not the one I always buy
- € Because I do not need fibre
- € To prevent weight gain
- € Because I think it is bad for my family
- € Because it seems expensive
- € Because I don't want to include fibre in my diet
- € Because my family would not like it

## **SECTION II**

**6) Select the intensity of the following emotions experienced after tasting the sample.**

|              | Nothing | Slightly | Mildly | Very | Extremely |
|--------------|---------|----------|--------|------|-----------|
| Active       | €       | €        | €      | €    | €         |
| Tame         | €       | €        | €      | €    | €         |
| Bored        | €       | €        | €      | €    | €         |
| Calm         | €       | €        | €      | €    | €         |
| Disgusted    | €       | €        | €      | €    | €         |
| Mild         | €       | €        | €      | €    | €         |
| Enthusiastic | €       | €        | €      | €    | €         |
| Worried      | €       | €        | €      | €    | €         |
| Free         | €       | €        | €      | €    | €         |
| Good         | €       | €        | €      | €    | €         |
| Good natured | €       | €        | €      | €    | €         |
| Guilty       | €       | €        | €      | €    | €         |
| Adventurous  | €       | €        | €      | €    | €         |
| Happy        | €       | €        | €      | €    | €         |
| Interested   | €       | €        | €      | €    | €         |
| Secure       | €       | €        | €      | €    | €         |

|               |   |   |   |   |   |
|---------------|---|---|---|---|---|
| Joyful        | € | € | € | € | € |
| Loving        | € | € | € | € | € |
| Wild          | € | € | € | € | € |
| Nostalgic     | € | € | € | € | € |
| Pleasant      | € | € | € | € | € |
| Satisfied     | € | € | € | € | € |
| Understanding | € | € | € | € | € |
| Warm          | € | € | € | € | € |
| Aggressive    | € | € | € | € | € |

## **Sample #2**

Please select the other sample and write its three-digit code \_\_\_\_\_. First taste the sample and then answer the following questions.

### **SECTION I**

#### **1) How much do you like this sample?**

|                               |                       |                       |                       |                       |                       |                       |                       |                       |                       |                            |
|-------------------------------|-----------------------|-----------------------|-----------------------|-----------------------|-----------------------|-----------------------|-----------------------|-----------------------|-----------------------|----------------------------|
|                               | 1                     | 2                     | 3                     | 4                     | 5                     | 6                     | 7                     | 8                     | 9                     |                            |
| <i>I extremely dislike it</i> | <input type="radio"/> | <i>I extremely like it</i> |

#### **2) From the following list, check all the attributes which best describe the sample. Choose all that apply.**

- |              |                 |                    |
|--------------|-----------------|--------------------|
| € Natural    | € Coarse        | € Hard             |
| € Tasty      | € Rubbery       | € Strange taste    |
| € Soft       | € Dark          | € Unpleasant aroma |
| € Fibrous    | € Gritty        | € Insipid          |
| € Uniform    | € Lack of taste | € Unpleasant       |
| € Homogenous | € Flexible      | aftertaste         |
| € Granulated | € Sticky        | € Brittle          |

#### **3) Would you buy this product?**

|                                      |                       |                       |                       |                       |                       |                                  |
|--------------------------------------|-----------------------|-----------------------|-----------------------|-----------------------|-----------------------|----------------------------------|
|                                      | 1                     | 2                     | 3                     | 4                     | 5                     |                                  |
| <i>I would definitely not buy it</i> | <input type="radio"/> | <i>I would definitely buy it</i> |

#### **4) If your previous answer (Question 3) was 4 or 5, then why would you buy it? Choose as many answers as you see fit.**

- € Because it is healthy
- € Because it is tasty
- € To avoid weight gain

- € Because it is high in calories
- € Because it is good for my family
- € Because I want to include fibre in my diet
- € Because my kids would like it

**5) If your previous answer to Question 3 was 1, 2 or 3, then why wouldn't you buy it? Choose as many answers as you see fit.**

- € Because it does not seem healthy
- € Because it is distasteful
- € Because it is not the one I always buy
- € Because I do not need fibre
- € To prevent weight gain
- € Because I think it is bad for my family
- € Because it seems expensive
- € Because I don't want to include fibre in my diet
- € Because my family would not like it

## **SECTION II**

**6) Select the intensity of the following emotions experienced after tasting the sample.**

|               | Nothing | Slightly | Mildly | Very | Extremely |
|---------------|---------|----------|--------|------|-----------|
| Bored         | €       | €        | €      | €    | €         |
| Active        | €       | €        | €      | €    | €         |
| Warm          | €       | €        | €      | €    | €         |
| Pleasant      | €       | €        | €      | €    | €         |
| Aggressive    | €       | €        | €      | €    | €         |
| Joyful        | €       | €        | €      | €    | €         |
| Loving        | €       | €        | €      | €    | €         |
| Disgusted     | €       | €        | €      | €    | €         |
| Adventurous   | €       | €        | €      | €    | €         |
| Good          | €       | €        | €      | €    | €         |
| Good natured  | €       | €        | €      | €    | €         |
| Calm          | €       | €        | €      | €    | €         |
| Understanding | €       | €        | €      | €    | €         |
| Guilty        | €       | €        | €      | €    | €         |
| Enthusiastic  | €       | €        | €      | €    | €         |
| Happy         | €       | €        | €      | €    | €         |
| Tame          | €       | €        | €      | €    | €         |
| Interested    | €       | €        | €      | €    | €         |
| Mild          | €       | €        | €      | €    | €         |
| Free          | €       | €        | €      | €    | €         |
| Nostalgic     | €       | €        | €      | €    | €         |
| Worried       | €       | €        | €      | €    | €         |

|           |   |   |   |   |   |
|-----------|---|---|---|---|---|
| Wild      | € | € | € | € | € |
| Satisfied | € | € | € | € | € |
| Secure    | € | € | € | € | € |

**Thank you!**

## Sensory evaluation of chocolate milk

You will receive two samples of chocolate milk. Please answer the following questions and then evaluate the two samples.

Age \_\_\_\_\_

Gender

- € Female  
€ Male  
€ Preferred not to say

How often do you eat pasta?

- € Every day
- € At least once a week
- € At least once a month
- € Never

### Sample #1

Please select one of the samples and write its three-digit code \_\_\_\_\_. First taste the sample and then answer the following questions.

## SECTION I

**1) How much do you like this sample?**

[illegible]

2) How did you feel about the consistency of this product?

Much too thin    2    3    *Just about right*    5    6    Much too thick  
 ○    ○    ○    ○    ○    ○    ○

3) How did you feel about the flavour of this product?

*Much too little*      3      *Just about right*      5      6      *Much too much*

☐    ☐    ☐    ☒    ☐    ☐    ☐

4) How did you feel about the sweetness of this product?

|                       |                       |                       |                         |                       |                       |                       |
|-----------------------|-----------------------|-----------------------|-------------------------|-----------------------|-----------------------|-----------------------|
| <i>Not at all</i>     |                       |                       |                         |                       |                       |                       |
| <i>Sweet enough</i>   | 2                     | 3                     | <i>Just about right</i> | 5                     | 6                     | <i>Much too Sweet</i> |
| <input type="radio"/> | <input type="radio"/> | <input type="radio"/> | <input type="radio"/>   | <input type="radio"/> | <input type="radio"/> | <input type="radio"/> |

5) From the following list, check all the attributes which best describe the sample. Choose all that apply.

- |                                                   |                                                |                                           |
|---------------------------------------------------|------------------------------------------------|-------------------------------------------|
| <input type="checkbox"/> Smooth                   | <input type="checkbox"/> Strong chocolate      | <input type="checkbox"/> Milk flavour     |
| <input type="checkbox"/> Strong chocolate flavour | <input type="checkbox"/> aroma                 | <input type="checkbox"/> Unpleasant Aroma |
| <input type="checkbox"/> Natural                  | <input type="checkbox"/> Artificial            | <input type="checkbox"/> Greasy           |
| <input type="checkbox"/> Dark                     | <input type="checkbox"/> Coarse                | <input type="checkbox"/> Lacking taste    |
| <input type="checkbox"/> Gritty                   | <input type="checkbox"/> Creamy                | <input type="checkbox"/> Pale             |
| <input type="checkbox"/> Bitter                   | <input type="checkbox"/> unpleasant Aftertaste | <input type="checkbox"/> Acidic           |
|                                                   | <input type="checkbox"/> Strange taste         | <input type="checkbox"/> Bland            |
|                                                   | <input type="checkbox"/> Healthy               |                                           |

6) Would you buy this product?

|                                      |                       |                       |                       |                       |                       |                                  |
|--------------------------------------|-----------------------|-----------------------|-----------------------|-----------------------|-----------------------|----------------------------------|
|                                      | 1                     | 2                     | 3                     | 4                     | 5                     |                                  |
| <i>I would definitely not buy it</i> | <input type="radio"/> | <i>I would definitely buy it</i> |

7) If your previous answer (Question 6) was 4 or 5, then why would you buy it? Choose as many answers as you see fit.

- ☐ Because it is healthy
- ☐ Because it is tasty
- ☐ To avoid weight gain
- ☐ Because it is high in calories
- ☐ Because it is good for my family
- ☐ Because I want to include fibre in my diet
- ☐ Because my kids would like it

8) If your previous answer to Question 6 was 1, 2 or 3, then why wouldn't you buy it? Choose as many answers as you see fit.

- ☐ Because it does not seem healthy
- ☐ Because it is distasteful
- ☐ Because it is not the one I always buy
- ☐ Because I do not need fibre
- ☐ To prevent weight gain
- ☐ Because I think it is bad for my family
- ☐ Because it seems expensive

- € Because I don't want to include fibre in my diet
- € Because my family would not like it

## **SECTION II**

**9) Select the intensity of the following emotions experienced after tasting the sample.**

|               | <b>Nothing</b> | <b>Slightly</b> | <b>Mildly</b> | <b>Very</b> | <b>Extremely</b> |
|---------------|----------------|-----------------|---------------|-------------|------------------|
| Worried       | €              | €               | €             | €           | €                |
| Good          | €              | €               | €             | €           | €                |
| Interested    | €              | €               | €             | €           | €                |
| Happy         | €              | €               | €             | €           | €                |
| Active        | €              | €               | €             | €           | €                |
| Guilty        | €              | €               | €             | €           | €                |
| Good natured  | €              | €               | €             | €           | €                |
| Free          | €              | €               | €             | €           | €                |
| Satisfied     | €              | €               | €             | €           | €                |
| Pleasant      | €              | €               | €             | €           | €                |
| Warm          | €              | €               | €             | €           | €                |
| Nostalgic     | €              | €               | €             | €           | €                |
| Wild          | €              | €               | €             | €           | €                |
| Mild          | €              | €               | €             | €           | €                |
| Loving        | €              | €               | €             | €           | €                |
| Joyful        | €              | €               | €             | €           | €                |
| Bored         | €              | €               | €             | €           | €                |
| Aggressive    | €              | €               | €             | €           | €                |
| Enthusiastic  | €              | €               | €             | €           | €                |
| Disgusted     | €              | €               | €             | €           | €                |
| Understanding | €              | €               | €             | €           | €                |
| Tame          | €              | €               | €             | €           | €                |
| Secure        | €              | €               | €             | €           | €                |
| Calm          | €              | €               | €             | €           | €                |
| Adventurous   | €              | €               | €             | €           | €                |

## **Sample #2**

Please select the other sample and write its three-digit code \_\_\_\_\_. First taste the sample and then answer the following questions.

## **SECTION I**

**1) How much do you like this sample?**

|                               |                       |                       |                       |                       |                       |                       |                       |                       |                       |                            |
|-------------------------------|-----------------------|-----------------------|-----------------------|-----------------------|-----------------------|-----------------------|-----------------------|-----------------------|-----------------------|----------------------------|
|                               | 1                     | 2                     | 3                     | 4                     | 5                     | 6                     | 7                     | 8                     | 9                     |                            |
| <i>I extremely dislike it</i> | <input type="radio"/> | <i>I extremely like it</i> |



2) How did you feel about the consistency of this product?

|                       |                       |                       |                         |                       |                       |                       |
|-----------------------|-----------------------|-----------------------|-------------------------|-----------------------|-----------------------|-----------------------|
| <i>Much too thin</i>  | 2                     | 3                     | <i>Just about right</i> | 5                     | 6                     | <i>Much too thick</i> |
| <input type="radio"/> | <input type="radio"/> | <input type="radio"/> | <input type="radio"/>   | <input type="radio"/> | <input type="radio"/> | <input type="radio"/> |

3) How did you feel about the flavour of this product?

|                        |                       |                         |                       |                       |                       |
|------------------------|-----------------------|-------------------------|-----------------------|-----------------------|-----------------------|
| <i>Much too little</i> | 3                     | <i>Just about right</i> | 5                     | 6                     | <i>Much too much</i>  |
| <input type="radio"/>  | <input type="radio"/> | <input type="radio"/>   | <input type="radio"/> | <input type="radio"/> | <input type="radio"/> |

4) How did you feel about the sweetness of this product?

|                                |                       |                       |                         |                       |                       |                       |
|--------------------------------|-----------------------|-----------------------|-------------------------|-----------------------|-----------------------|-----------------------|
| <i>Not at all Sweet enough</i> | 2                     | 3                     | <i>Just about right</i> | 5                     | 6                     | <i>Much too Sweet</i> |
| <input type="radio"/>          | <input type="radio"/> | <input type="radio"/> | <input type="radio"/>   | <input type="radio"/> | <input type="radio"/> | <input type="radio"/> |

5) From the following list, check all the attributes which best describe the sample. Choose all that apply.

- |                 |                    |              |
|-----------------|--------------------|--------------|
| € Lacking taste | € Unpleasant Aroma | € Artificial |
| € Bitter        | € Creamy           | € Dark       |
| € Coarse        | € Strong chocolate | € Greasy     |
| € Smooth        | aroma              | € Gritty     |
| € Strange taste | € Strong chocolate | € Unpleasant |
| € Milk flavour  | flavour            | Aftertaste   |
| € Natural       | € Bland            | € Healthy    |
| € Pale          | € Acidic           |              |

6) Would you buy this product?

|                                      |                       |                       |                       |                       |                       |                                  |
|--------------------------------------|-----------------------|-----------------------|-----------------------|-----------------------|-----------------------|----------------------------------|
| <i>I would definitely not buy it</i> | 1                     | 2                     | 3                     | 4                     | 5                     | <i>I would definitely buy it</i> |
|                                      | <input type="radio"/> |                                  |

7) If your previous answer (Question 6) was 4 or 5, then why would you buy it? Choose as many answers as you see fit.

- € Because it is healthy

- € Because it is tasty
- € To avoid weight gain
- € Because it is high in calories
- € Because it is good for my family
- € Because I want to include fibre in my diet
- € Because my kids would like it

**8) If your previous answer to Question 6 was 1, 2 or 3, then why wouldn't you buy it? Choose as many answers as you see fit.**

- € Because it does not seem healthy
- € Because it is distasteful
- € Because it is not the one I always buy
- € Because I do not need fibre
- € To prevent weight gain
- € Because I think it is bad for my family
- € Because it seems expensive
- € Because I don't want to include fibre in my diet
- € Because my family would not like it

## **SECTION II**

**9) Select the intensity of the following emotions experienced after tasting the sample.**

|               | Nothing | Slightly | Mildly | Very | Extremely |
|---------------|---------|----------|--------|------|-----------|
| Joyful        | €       | €        | €      | €    | €         |
| Free          | €       | €        | €      | €    | €         |
| Satisfied     | €       | €        | €      | €    | €         |
| Pleasant      | €       | €        | €      | €    | €         |
| Guilty        | €       | €        | €      | €    | €         |
| Good natured  | €       | €        | €      | €    | €         |
| Worried       | €       | €        | €      | €    | €         |
| Wild          | €       | €        | €      | €    | €         |
| Mild          | €       | €        | €      | €    | €         |
| Loving        | €       | €        | €      | €    | €         |
| Enthusiastic  | €       | €        | €      | €    | €         |
| Disgusted     | €       | €        | €      | €    | €         |
| Understanding | €       | €        | €      | €    | €         |
| Warm          | €       | €        | €      | €    | €         |
| Nostalgic     | €       | €        | €      | €    | €         |
| Good          | €       | €        | €      | €    | €         |
| Interested    | €       | €        | €      | €    | €         |
| Bored         | €       | €        | €      | €    | €         |
| Aggressive    | €       | €        | €      | €    | €         |
| Secure        | €       | €        | €      | €    | €         |
| Calm          | €       | €        | €      | €    | €         |

|             |   |   |   |   |   |
|-------------|---|---|---|---|---|
| Adventurous | € | € | € | € | € |
| Happy       | € | € | € | € | € |
| Active      | € | € | € | € | € |
| Tame        | € | € | € | € | € |

**Thank you!**

## Sensory evaluation of bread

You will receive two samples of bread. Please answer the following questions and then evaluate the two samples.

Age \_\_\_\_\_

Gender

- € Female
- € Male
- € Preferred not to say

How often do you eat bread?

- € 3-4 times a week
- € At least once a week
- € At least once a month
- € Never

### Sample #1

Please select one of the samples and write its three-digit code \_\_\_\_\_. First taste the sample and then answer the following questions.

#### SECTION I

1) How much do you like this sample?

|                               |                       |                       |                       |                       |                       |                       |                       |                       |                       |                            |
|-------------------------------|-----------------------|-----------------------|-----------------------|-----------------------|-----------------------|-----------------------|-----------------------|-----------------------|-----------------------|----------------------------|
|                               | 1                     | 2                     | 3                     | 4                     | 5                     | 6                     | 7                     | 8                     | 9                     |                            |
| <i>I extremely dislike it</i> | <input type="radio"/> | <i>I extremely like it</i> |

2) How did you feel about the saltiness of this product?

|                        |                       |                       |                         |                       |                       |                       |
|------------------------|-----------------------|-----------------------|-------------------------|-----------------------|-----------------------|-----------------------|
| <i>Much too little</i> | 2                     | 3                     | <i>Just about right</i> | 5                     | 6                     | <i>Much too much</i>  |
| <input type="radio"/>  | <input type="radio"/> | <input type="radio"/> | <input type="radio"/>   | <input type="radio"/> | <input type="radio"/> | <input type="radio"/> |

3) From the following list, check all the attributes which best describe the sample. Choose all that apply.

- |           |                         |                |
|-----------|-------------------------|----------------|
| € Fibrous | € Strange taste         | € Salty        |
| € Soft    | € Stodgy                | € Hard         |
| € Natural | € Bitter                | € Hard to chew |
| € Compact | € Airy                  | € Bland        |
| € Fluffy  | € Hard to swallow       | € Sweet        |
| € Dry     | € Unpleasant aroma      | € Crispy       |
| € Moist   | € Unpleasant aftertaste | € Acidic       |

**4) Would you buy this product?**

|                                      |                       |                       |                       |                       |                       |                                  |
|--------------------------------------|-----------------------|-----------------------|-----------------------|-----------------------|-----------------------|----------------------------------|
|                                      | 1                     | 2                     | 3                     | 4                     | 5                     |                                  |
| <i>I would definitely not buy it</i> |                       |                       |                       |                       |                       | <i>I would definitely buy it</i> |
|                                      | <input type="radio"/> |                                  |

**5) If your previous answer (Question 4) was 4 or 5, then why would you buy it? Choose as many answers as you see fit.**

- € Because it is healthy
- € Because it is tasty
- € To avoid weight gain
- € Because it is high in calories
- € Because it is good for my family
- € Because I want to include fibre in my diet
- € Because my kids would like it

**6) If your previous answer to Question 4 was 1, 2 or 3, then why wouldn't you buy it? Choose as many answers as you see fit.**

- € Because it does not seem healthy
- € Because it is distasteful
- € Because it is not the one I always buy
- € Because I do not need fibre
- € To prevent weight gain
- € Because I think it is bad for my family
- € Because it seems expensive
- € Because I don't want to include fibre in my diet
- € Because my family would not like it

**SECTION II**

**7) Select the intensity of the following emotions experienced after tasting the sample.**

|              | Nothing | Slightly | Mildly | Very | Extremely |
|--------------|---------|----------|--------|------|-----------|
| Wild         | €       | €        | €      | €    | €         |
| Mild         | €       | €        | €      | €    | €         |
| Pleasant     | €       | €        | €      | €    | €         |
| Guilty       | €       | €        | €      | €    | €         |
| Good natured | €       | €        | €      | €    | €         |
| Worried      | €       | €        | €      | €    | €         |
| Loving       | €       | €        | €      | €    | €         |
| Nostalgic    | €       | €        | €      | €    | €         |
| Good         | €       | €        | €      | €    | €         |
| Aggressive   | €       | €        | €      | €    | €         |
| Secure       | €       | €        | €      | €    | €         |
| Calm         | €       | €        | €      | €    | €         |

|               |   |   |   |   |   |
|---------------|---|---|---|---|---|
| Adventurous   | € | € | € | € | € |
| Happy         | € | € | € | € | € |
| Active        | € | € | € | € | € |
| Tame          | € | € | € | € | € |
| Interested    | € | € | € | € | € |
| Bored         | € | € | € | € | € |
| Joyful        | € | € | € | € | € |
| Enthusiastic  | € | € | € | € | € |
| Disgusted     | € | € | € | € | € |
| Understanding | € | € | € | € | € |
| Warm          | € | € | € | € | € |
| Free          | € | € | € | € | € |
| Satisfied     | € | € | € | € | € |

## **Sample #2**

Please select the other sample and write its three-digit code \_\_\_\_\_. First taste the sample and then answer the following questions.

### **SECTION I**

#### **1) How much do you like this sample?**

*I extremely dislike it*
1   2   3   4   5   6   7   8   9
*I extremely like it*

☐   ☐   ☐   ☐   ☐   ☐   ☐   ☐   ☐

#### **2) How did you feel about the saltiness of this product?**

*Much too little*   2   3   *Just about right*   5   6   *Much too much*

☐   ☐   ☐   ☐   ☐   ☐   ☐

#### **3) From the following list, check all the attributes which best describe the sample. Choose all that apply.**

- |                         |                    |           |
|-------------------------|--------------------|-----------|
| € Dry                   | € Strange taste    | € Soft    |
| € Airy                  | € Bland            | € Natural |
| € Hard to swallow       | € Sweet            | € Compact |
| € Unpleasant aftertaste | € Crispy           | € Fluffy  |
| € Salty                 | € Acidic           | € Moist   |
| € Hard                  | € Unpleasant aroma | € Stodgy  |
| € Hard to chew          | € Fibrous          | € Bitter  |

**4) Would you buy this product?**

*I would definitely not buy it*      1      2      3      4      5      *I would definitely buy it*

☐      ☐      ☐      ☐      ☐

**5) If your previous answer (Question 4) was 4 or 5, then why would you buy it? Choose as many answers as you see fit.**

- € Because it is healthy
- € Because it is tasty
- € To avoid weight gain
- € Because it is high in calories
- € Because it is good for my family
- € Because I want to include fibre in my diet
- € Because my kids would like it

**6) If your previous answer to Question 4 was 1, 2 or 3, then why wouldn't you buy it? Choose as many answers as you see fit.**

- € Because it does not seem healthy
- € Because it is distasteful
- € Because it is not the one I always buy
- € Because I do not need fibre
- € To prevent weight gain
- € Because I think it is bad for my family
- € Because it seems expensive
- € Because I don't want to include fibre in my diet
- € Because my family would not like it

**SECTION II**

**7) Select the intensity of the following emotions experienced after tasting the sample.**

|               | Nothing | Slightly | Mildly | Very | Extremely |
|---------------|---------|----------|--------|------|-----------|
| Satisfied     | €       | €        | €      | €    | €         |
| Pleasant      | €       | €        | €      | €    | €         |
| Good natured  | €       | €        | €      | €    | €         |
| Disgusted     | €       | €        | €      | €    | €         |
| Understanding | €       | €        | €      | €    | €         |
| Warm          | €       | €        | €      | €    | €         |
| Free          | €       | €        | €      | €    | €         |
| Worried       | €       | €        | €      | €    | €         |
| Loving        | €       | €        | €      | €    | €         |
| Nostalgic     | €       | €        | €      | €    | €         |
| Good          | €       | €        | €      | €    | €         |
| Wild          | €       | €        | €      | €    | €         |

|              |   |   |   |   |   |
|--------------|---|---|---|---|---|
| Active       | € | € | € | € | € |
| Aggressive   | € | € | € | € | € |
| Secure       | € | € | € | € | € |
| Calm         | € | € | € | € | € |
| Adventurous  | € | € | € | € | € |
| Happy        | € | € | € | € | € |
| Guilty       | € | € | € | € | € |
| Tame         | € | € | € | € | € |
| Interested   | € | € | € | € | € |
| Bored        | € | € | € | € | € |
| Mild         | € | € | € | € | € |
| Joyful       | € | € | € | € | € |
| Enthusiastic | € | € | € | € | € |

**Thank you!**
